# Supplementary material
Source: PubMed Central journal article supplement (PMC2224236)
Supplement: pnas_0709082105_8.pdf [file pnas_0709082105_8.pdf]

**Table 3.** Statistics for the crystal structure of the Fab2- $\Delta$ C209 P4-P6 complex

|                                         |                       |
|-----------------------------------------|-----------------------|
| Data collection*                        |                       |
| Space group                             | C2                    |
| $a, b, c, \text{ \AA}$                  | 133.09, 53.23, 160.56 |
| $\alpha, \beta, \gamma, ^\circ$         | 90, 108.4, 90         |
| Resolution <sup>†</sup> , $\text{ \AA}$ | 50- 1.95 (2.0-1.95)   |
| $R_{\text{merge}}$                      | 0.088(0.48)           |
| $I/\sigma I$                            | 16.7 (1.6)            |
| Completeness, %                         | 98.4 (95.5)           |
| Redundancy                              | 5.2 (2.7)             |
| Refinement*                             |                       |
| No. reflections                         | 77127                 |
| $R_{\text{work}}/ R_{\text{free}}$      | 0.195 / 0.226         |
| No. atoms                               |                       |
| Protein                                 | 3276                  |
| RNA                                     | 3404                  |
| Mg ions                                 | 4                     |
| Water                                   | 533                   |
| rmsd bond length, $\text{ \AA}$         | 0.007                 |
| rmsd bond angles, $^\circ$              | 1.33                  |

---

\*Three crystals were used for data collection.

†Data in parentheses correspond to two last resolution shells.
