# Supplementary material
Source: PubMed Central journal article supplement (PMC2224236)

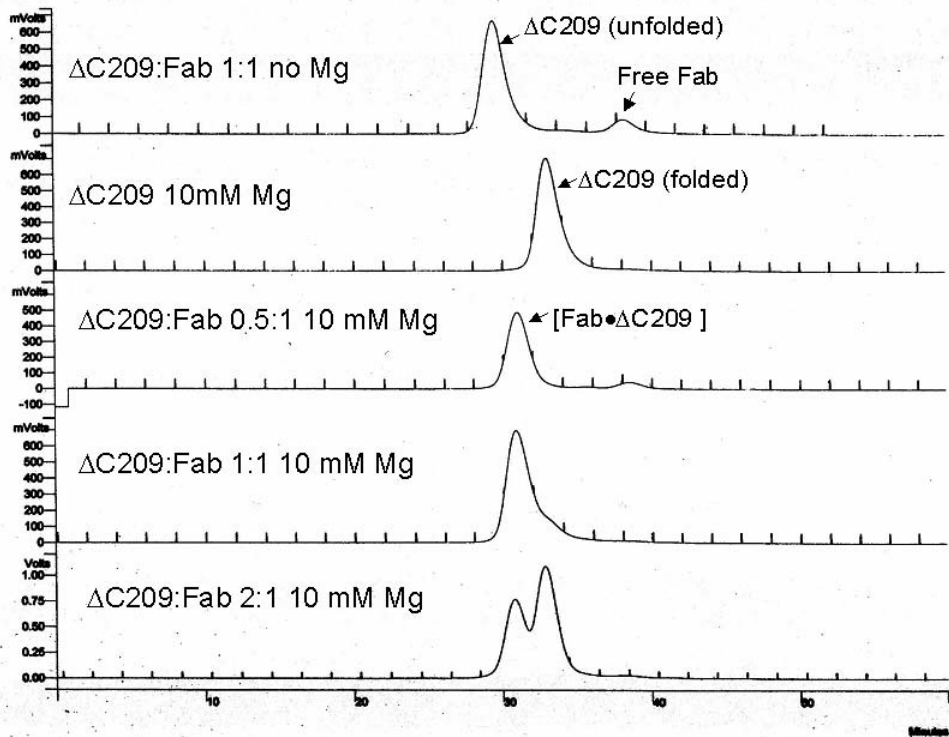

Supplement: pnas_0709082105_1.pdf [file pnas_0709082105_1.pdf]

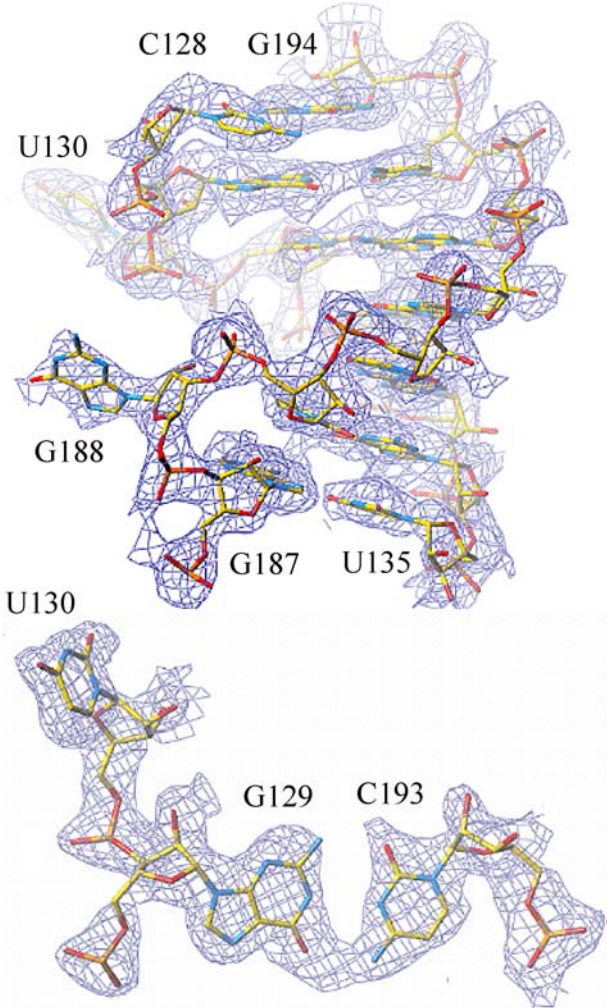

Supplement: pnas_0709082105_2.pdf [file pnas_0709082105_2.pdf]

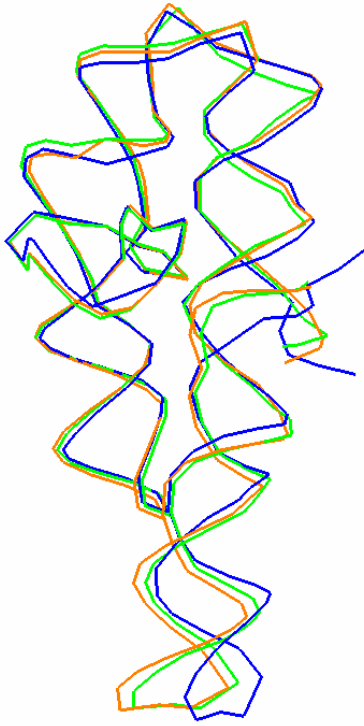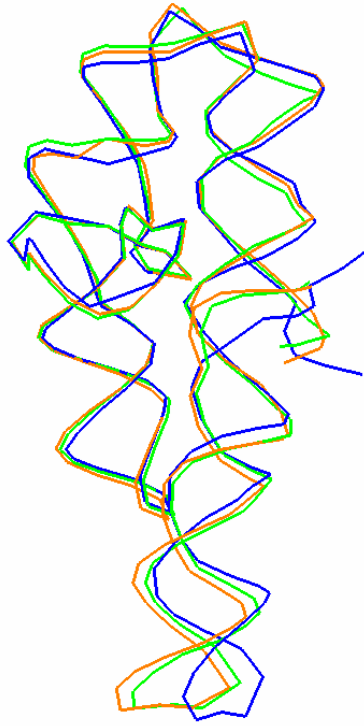

Supplement: pnas_0709082105_3.pdf [file pnas_0709082105_3.pdf]

A

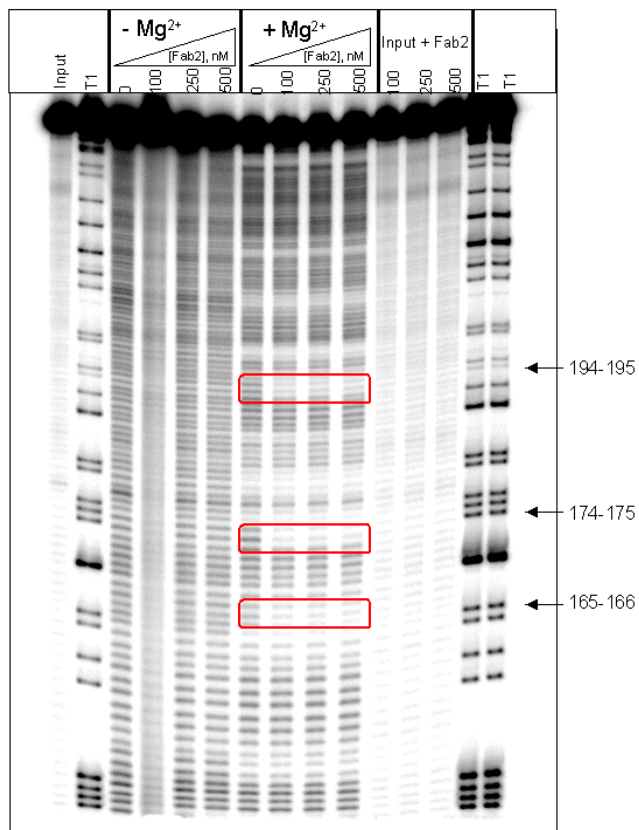

B

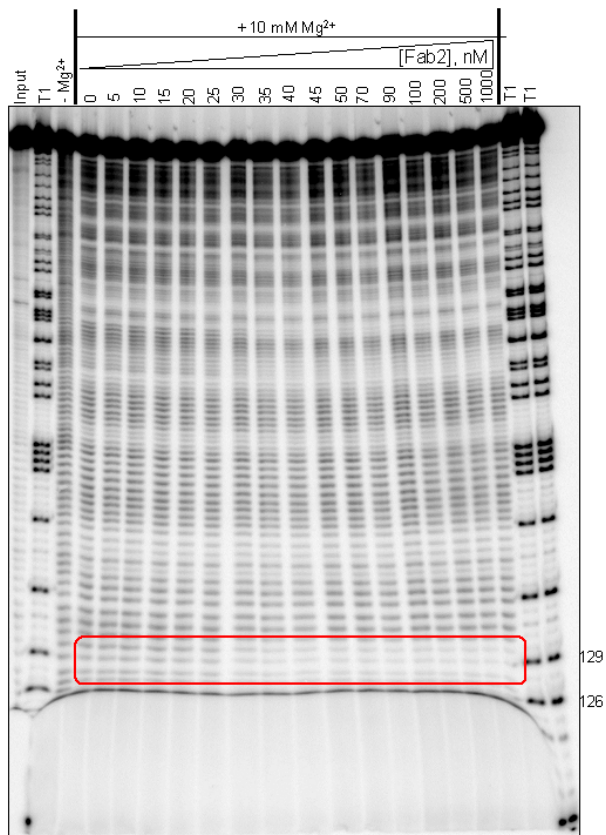

Supplement: pnas_0709082105_4.pdf [file pnas_0709082105_4.pdf]

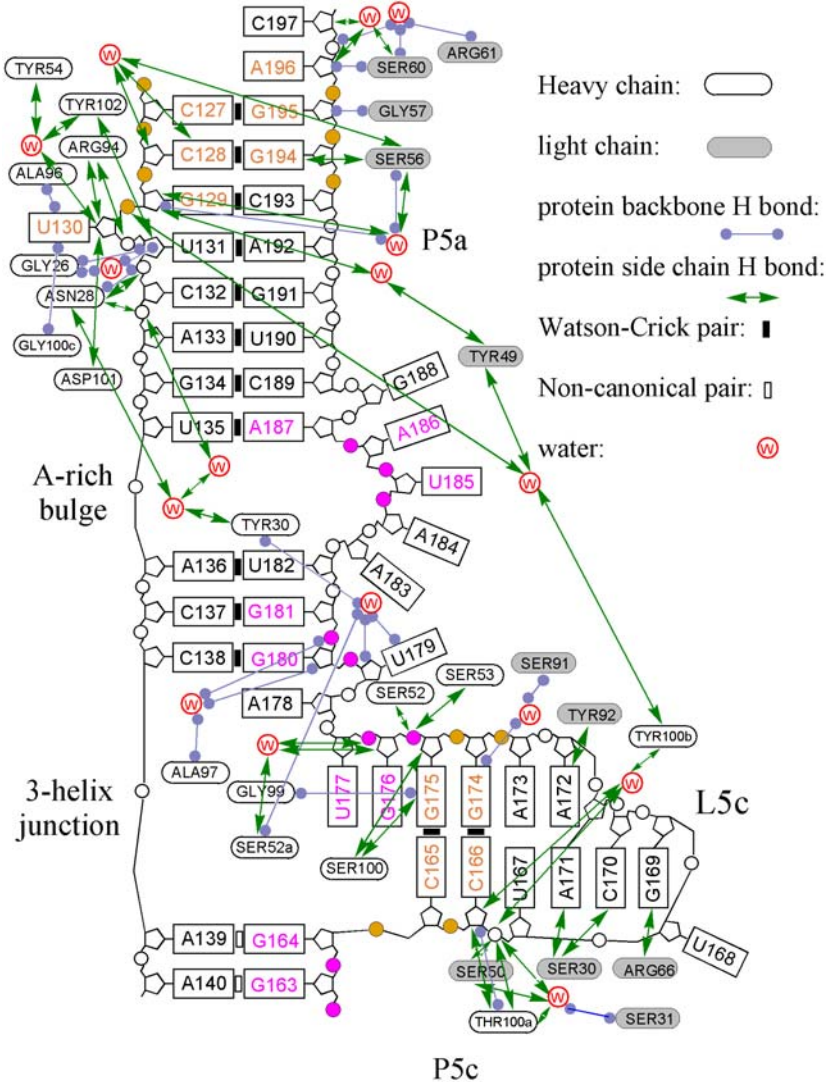

Supplement: pnas_0709082105_5.pdf [file pnas_0709082105_5.pdf]

A

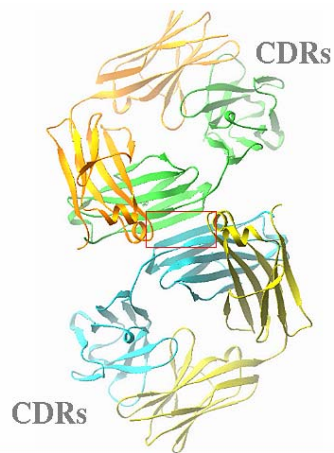

B

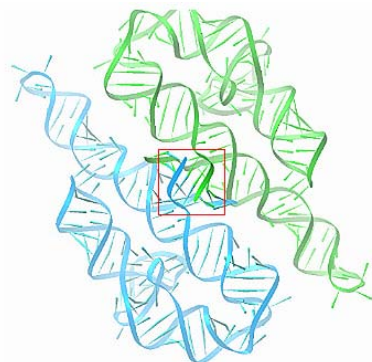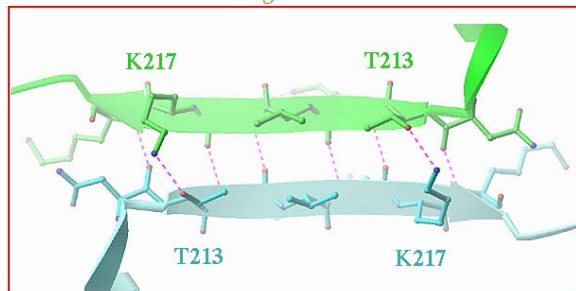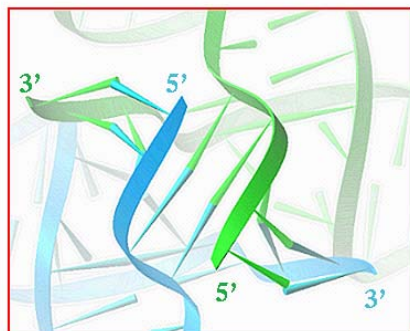

C

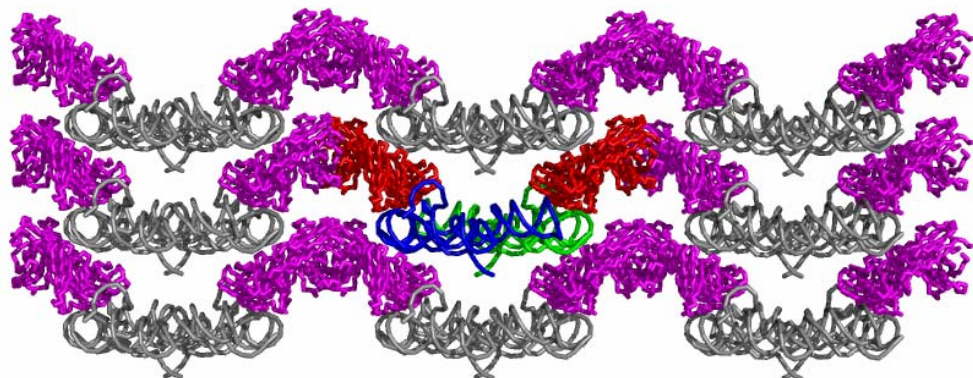

Supplement: pnas_0709082105_6.pdf [file pnas_0709082105_6.pdf]

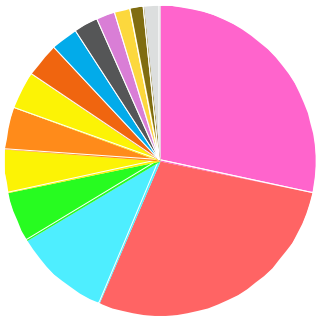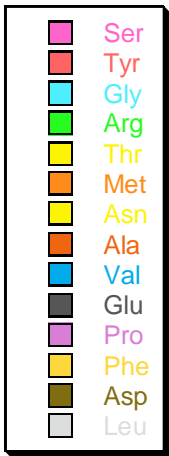

Supplement: pnas_0709082105_7.pdf [file pnas_0709082105_7.pdf]
